# Supplementary material
Source: Springer Nature journal article supplement (https://www.springermedizin.de/resource/supplementary/12916_2006_125_MOESM2_ESM.pdf/9599220)
Supplement: MOESM2 [file 9599220]

## Major endemic infectious diseases of public health importance

## Diseases targeted for eradication and elimination

## Epidemic-prone diseases

Diarrhoea in children  
less than 5 years of age

Pneumonia in children  
less than 5 years of age

New cases of HIV  
infection/AIDS

Malaria

Onchocerciasis

Sexually transmitted  
infections (STIs)

Trypanosomiasis

Tuberculosis

Poliomyelitis (acute  
flaccid paralysis)

Dracunculiasis

Leprosy

Neonatal tetanus

Cholera

Diarrhoea with blood

Measles

Meningitis

Plague

Viral hemorrhagic fevers

Yellow fever
